# Supplementary material
Source: publisher site journal article supplement (https://www.dovepress.com/article/614064)
Supplement: Supplementary file 1 [file 614064%20Supplementary%20Tables.docx]

**Supplementary Table 1** Hyperparameter search space and final parameters for machine learning models

| **Model** | **Hyperparameter** | **Search Space** | **Final selected value** |
| --- | --- | --- | --- |
| SVM | Cost | 0.5, 1, 2, 4, 8, 10 | 4 |
| Gamma | 0.01, 0.02, 0.05, 0.1, 0.2 | 0.1 |
| LightGBM | Num-leaves | 15, 31 | 15 |
| Max-depth | -1, 1, 3 | -1 |
| Learning-rate | 0.1, 0.2 | 0.2 |
| nrounds | 50 | 50 |
| Min-data-in-leaf | 30 | 30 |

**Abbreviations:** SVM, support vector machine; LightGBM, light gradient boosting machine.

**Supplementary Table 2** Final parameters of the Logistic Regression model

| **Variable** | **Estimate β** | **P value** | **Odds Ratio (OR)** |
| --- | --- | --- | --- |
| Fracture type | 1.358 | < 0.001 | 3.89 |
| Time | 0.384 | < 0.001 | 1.47 |
| CRP | -0.032 | < 0.001 | 0.97 |
| WBC | -0.229 | < 0.001 | 0.8 |
| RBC | -0.708 | 0.007 | 0.49 |
| DDimer | 0.00028 | < 0.001 | 1.00028 |
| PT-S | -0.943 | < 0.001 | 0.39 |

**Abbreviations:** Time, time from injury to hospital admission; WBC, white blood cell count; NE, neutrophil count; RBC, red blood cell count; CRP, C-reactive protein; PT-S, prothrombin time;
